# Supplementary material for: The Influence of Alcohol Consumption on Fighting, Shoplifting and Vandalism in Young Adults
Source: MDPI journal article supplement (doi:10.3390/ijerph18073509), 2021-03-28
Supplement: s1 [file s1]

**Supplementary Table S1.** Comparison of sociodemographic and parental characteristics for the those that have consumed alcohol in the past year (sample used in analysis;  $n \leq 3,408$ ) and those that have not consumed alcohol in the past year at age 24 years ( $n \leq 166$ )

|                                                 | Drinkers    | Non-drinkers | <i>p value</i> |
|-------------------------------------------------|-------------|--------------|----------------|
| <b>Sociodemographic characteristics</b>         |             |              |                |
| Age in years (mean (sd))                        | 24.5 (0.79) | 24.4 (0.78)  | 0.141          |
| Male sex (% (n))                                | 37 (1,277)  | 40 (66)      | 0.552          |
| Non-white ethnicity (% (n))                     | 2 (67)      | 5 (8)        | 0.010          |
| Maternal education - high school only (% (n))   | 50 (1,665)  | 59 (93)      | 0.030          |
| Housing tenure - rented (% (n))                 | 14 (468)    | 26 (40)      | < 0.001        |
| Household crowding - 1+ person per room (% (n)) | 4 (122)     | 6 (10)       | 0.083          |
| Maternal age at delivery in years (mean (sd))   | 29.4 (4.53) | 29.0 (5.27)  | 0.216          |
| <b>Parental characteristics</b>                 |             |              |                |
| Parental crime across childhood (% (n))         | 13 (429)    | 10 (16)      | 0.302          |
| Parental alcoholism across childhood (% (n))    | 8 (249)     | 4 (6)        | 0.082          |
